# Supplementary material for: Viruses Ubiquity and Diversity in Atacama Desert Endolithic Communities
Source: MDPI journal article supplement (doi:10.3390/v14091983), 2022-09-07
Supplement: s1 [file s1]

## SUPPLEMENTARY MATERIAL

### Viruses Ubiquity and Diversity in Atacama Desert Endolithic Communities

Leora Busse, Mike Tisza, Jocelyne DiRuggiero

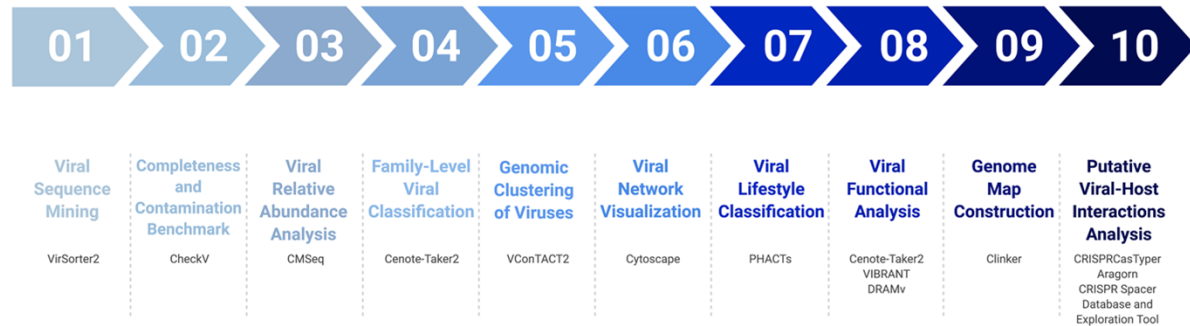

**Figure S1.** Computational pipeline and tools used to analyze the viromes in this study.

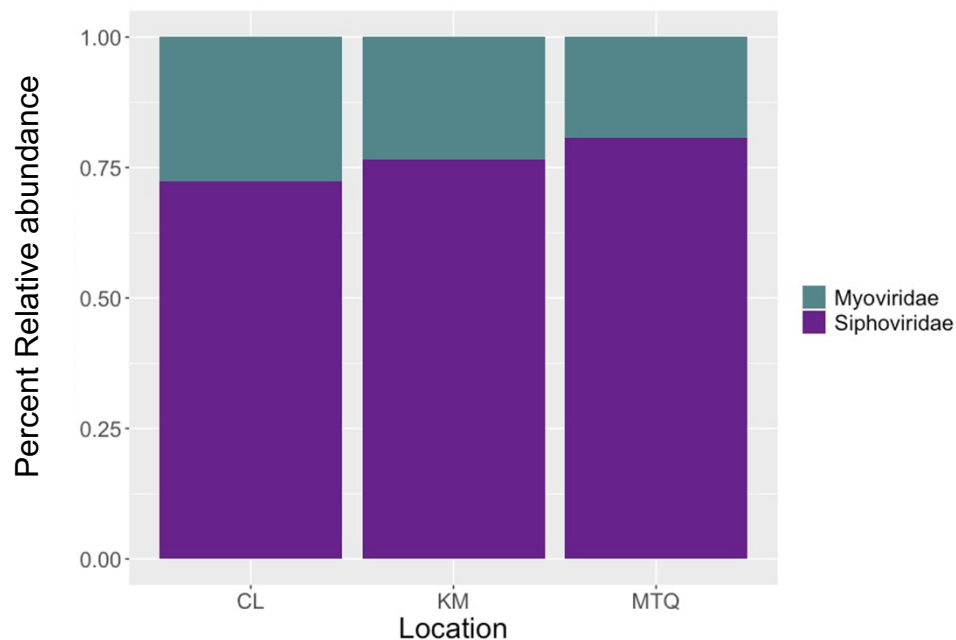

**Figure S2.** Relative abundances of viral families identified in the gypsum metagenomes from samples collected from the CL, KM, and MTQ sites.

A

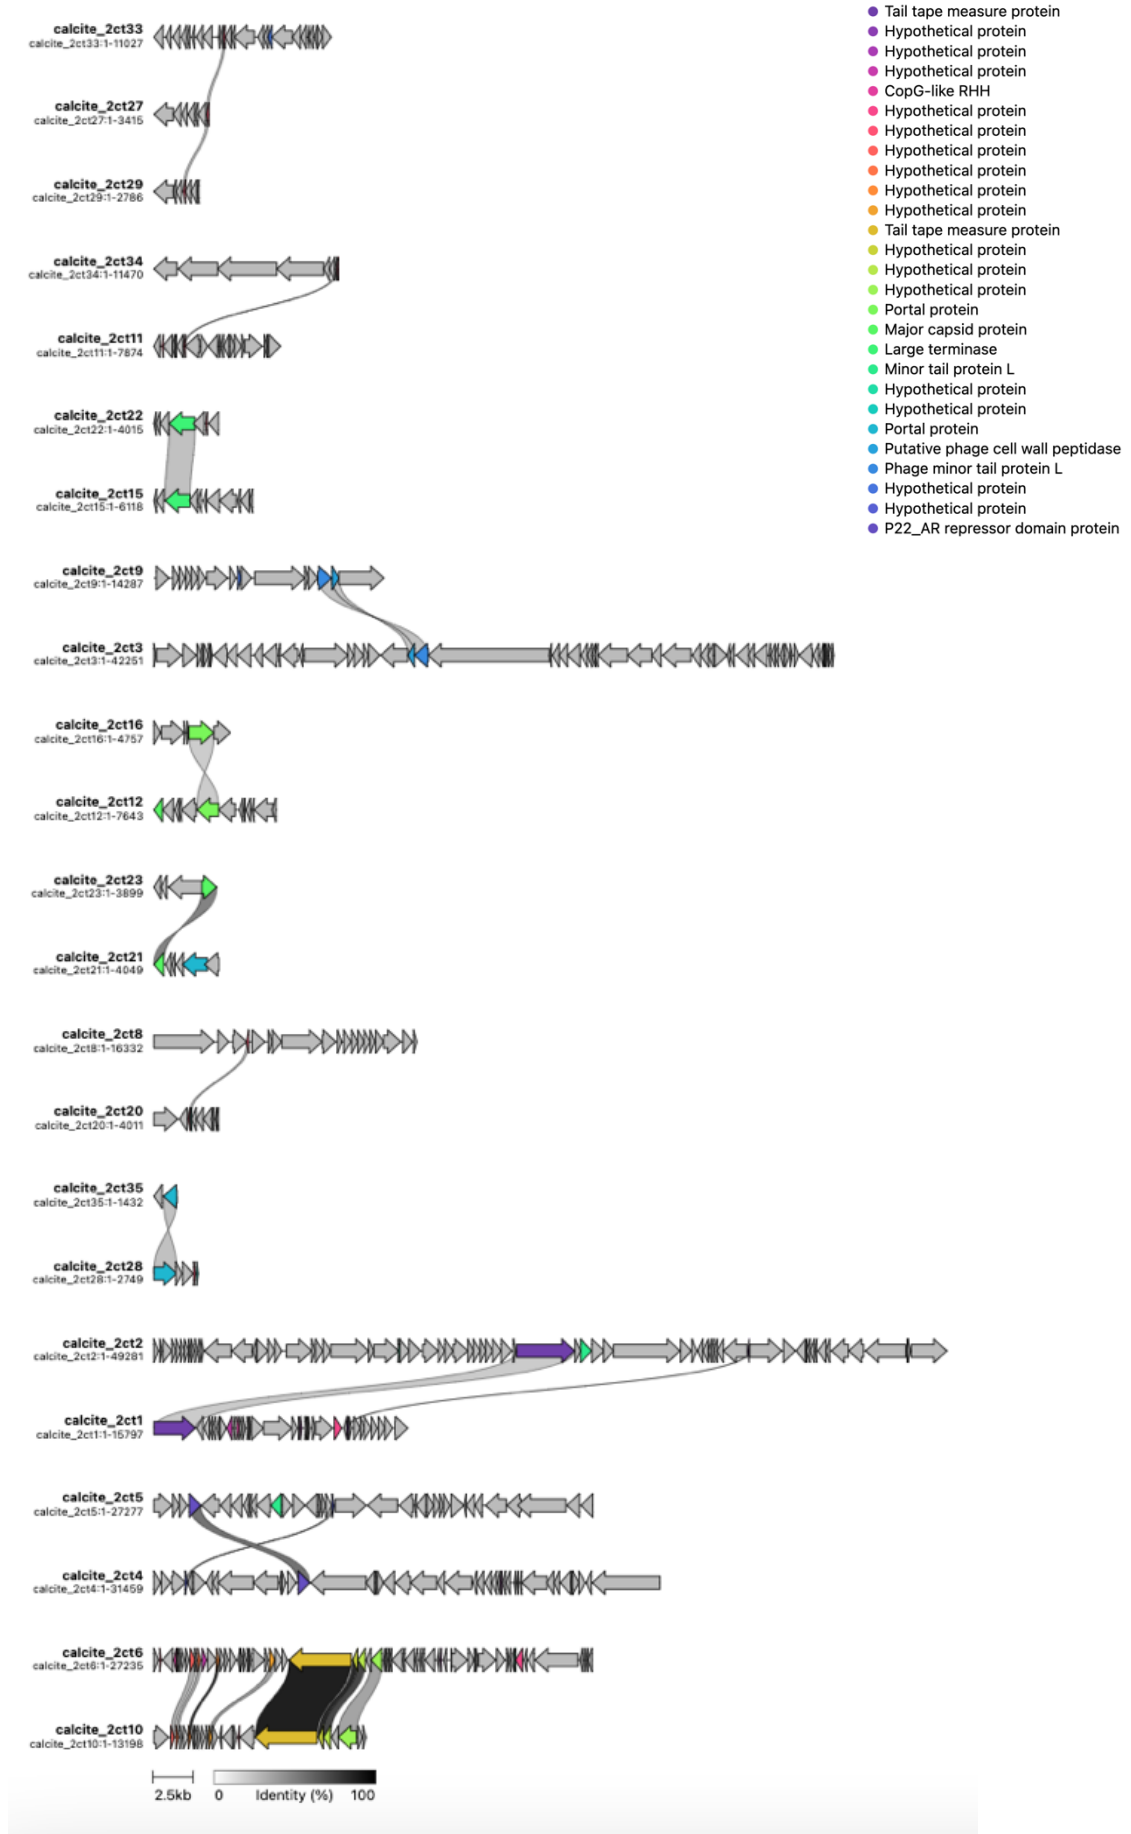

B

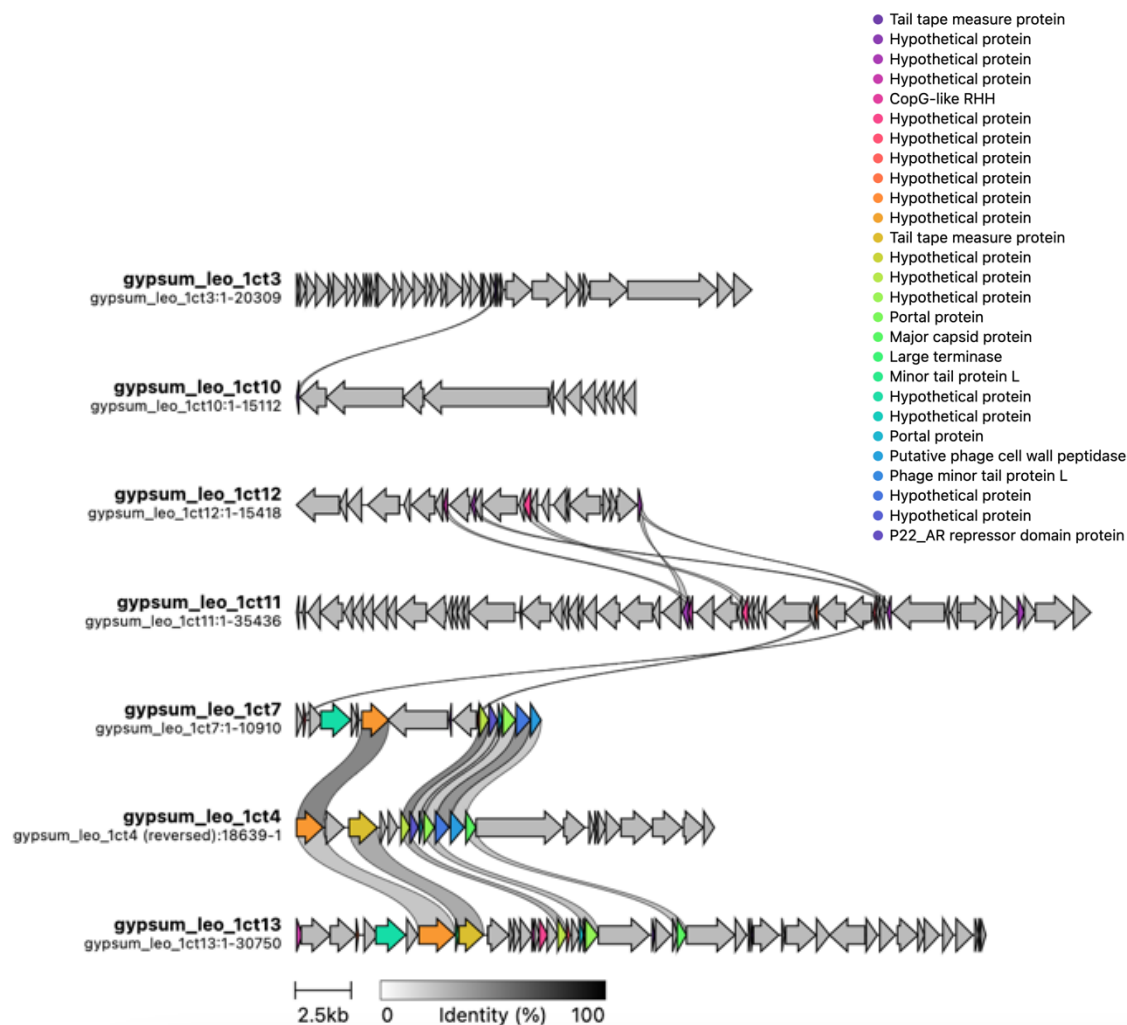

C

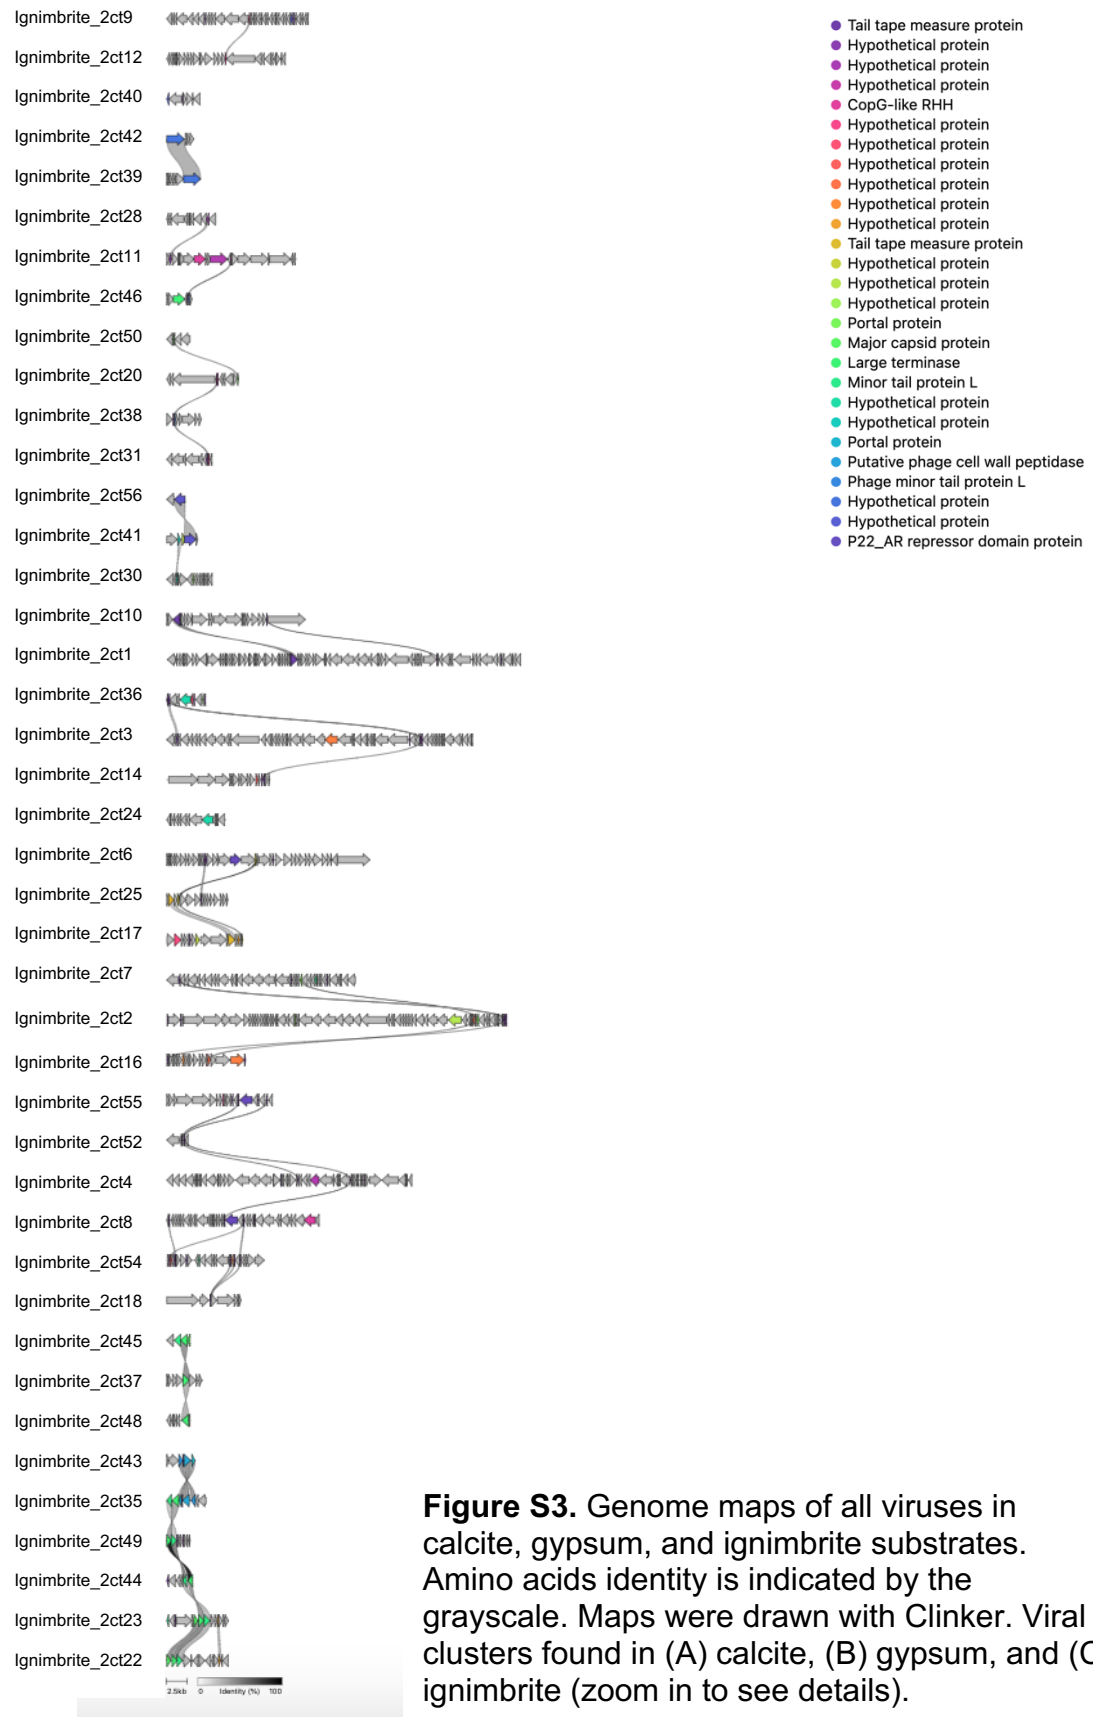

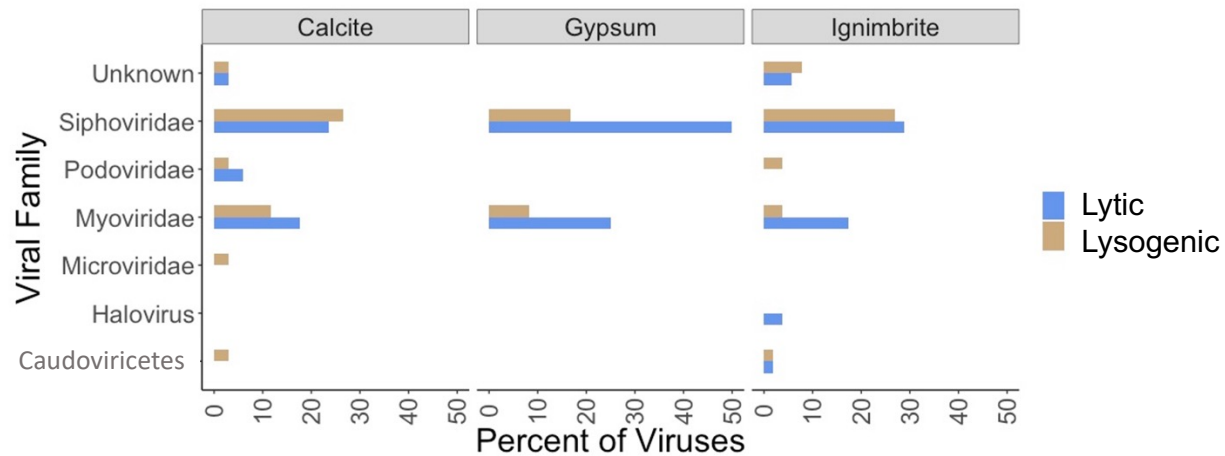

**Figure S4.** Relative abundances of viral families with lytic or lysogenic life cycles in the calcite, gypsum, and ignimbrite metagenomes.

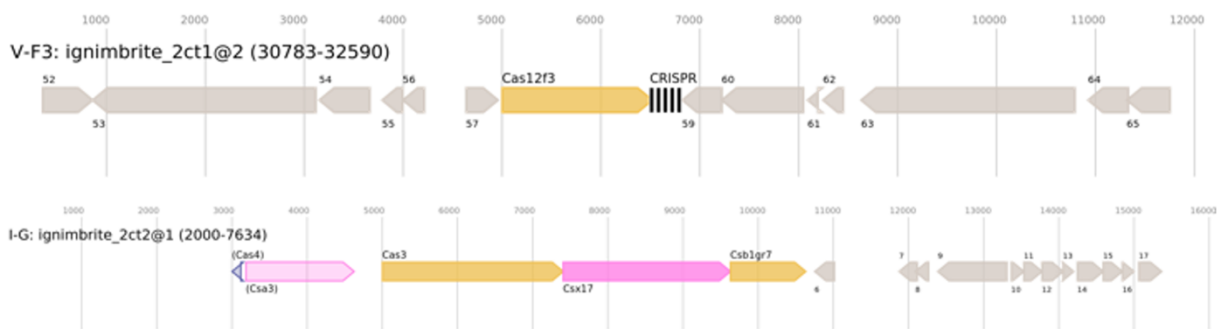

**Figure S5.** Viral genome maps showing CRISPR domains identified with CRISPRCasTyper for two viruses from the ignimbrite metagenomes. The striped black and white box shows a CRISPR array with numbers of spacer/repeat sequences. In yellow are CAS genes, in purple are accessory genes, and in light blue and light pink are genes with alignment scores below the thresholds. Unknown genes are in gray.

**Table S1.** Metagenomic libraries description

| Substrate  | Location              | Number of Libraries | Assembled Libraries Total Size (Gbp) | Number of Contigs in Assembled Libraries | Accession Number <sup>1</sup> |
|------------|-----------------------|---------------------|--------------------------------------|------------------------------------------|-------------------------------|
| Calcite    | Valle de la Luna (VL) | 3                   | 217                                  | 81,607                                   | 3300039108                    |
| Gypsum     | Cordon de Lila (CL)   | 3                   | 320                                  | 120,629                                  | 3300028913                    |
|            | KM37 (KM)             | 3                   |                                      |                                          |                               |
|            | Monturaqui (MTQ)      | 3                   |                                      |                                          |                               |
| Ignimbrite | Monturaqui (MTQ)      | 3                   | 164                                  | 50,371                                   | 3300039169                    |

<sup>1</sup>JGI Taxon OID number**Table S2.** Viral genomes identified in the three endolithic substrates

|           | VirSorter2      |          |              | CheckV  |                         |               | Cenote-Taker2    |                          | CMSeq     |
|-----------|-----------------|----------|--------------|---------|-------------------------|---------------|------------------|--------------------------|-----------|
| Substrate | Contig ID       | Coverage | Length (kbp) | Quality | Completeness Percentage | Contamination | ID               | Number of Hallmark Genes | Abundance |
| Gypsum    | k141_144888     | Full     | 24.963       | Low     | 21.65                   | 0             | gypsum_leo_1ct2  | 7                        | 17        |
| Gypsum    | k141_658652     | Full     | 20.309       | Low     | 26.15                   | 0             | gypsum_leo_1ct3  | 2                        | 19        |
| Gypsum    | k141_297749     | Full     | 18.639       | Low     | 21.95                   | 36.03         | gypsum_leo_1ct4  | 7                        | 21        |
| Gypsum    | k141_656469     | Full     | 18.435       | Low     | 34.49                   | 0             | gypsum_leo_1ct5  | 5                        | 24        |
| Gypsum    | k141_520133     | Full     | 13.922       | Low     | 37.26                   | 0             | gypsum_leo_1ct6  | 7                        | 24        |
| Gypsum    | k141_103458     | Full     | 10.91        | Low     | 25.93                   | 0             | gypsum_leo_1ct7  | 4                        | 50        |
| Gypsum    | k141_387731     | Full     | 9.69         | Low     | 26.93                   | 0             | gypsum_leo_1ct8  | 4                        | 48        |
| Gypsum    | k141_138735     | Full     | 9.361        | Low     | 26.36                   | 0             | gypsum_leo_1ct9  | 3                        | 13        |
| Gypsum    | k141_505949     | Full     | 15.112       | Low     | 20.58                   | 0             | gypsum_leo_1ct10 | 5                        | 18        |
| Gypsum    | k141_657276     | Partial  | 35.436       | Low     | 41.62                   | 35.26         | gypsum_leo_1ct11 | 7                        | 84        |
| Gypsum    | k141_373844     | Partial  | 15.418       | Medium  | 73                      | 26.92         | gypsum_leo_1ct12 | 3                        | 380       |
| Gypsum    | k141_642343     | Partial  | 30.75        | Low     | 21.96                   | 45.01         | gypsum_leo_1ct13 | 7                        | 15        |
| Calcite   | Ga0397528_00778 | Full     | 15.797       | Low     | 17.05                   | 0             | calcite_2ct1     | 1                        | 12        |
| Calcite   | Ga0397528_00045 | Full     | 49.281       | High    | 98.79                   | 0             | calcite_2ct2     | 8                        | 16        |
| Calcite   | Ga0397528_00071 | Full     | 42.251       | High    | 100                     | 0             | calcite_2ct3     | 9                        | 11        |
| Calcite   | Ga0397528_00160 | Full     | 31.459       | Low     | 31.28                   | 0             | calcite_2ct4     | 5                        | 21        |

|            |                 |         |        |        |       |   |                 |   |     |
|------------|-----------------|---------|--------|--------|-------|---|-----------------|---|-----|
| Calcite    | Ga0397528_00210 | Full    | 27.277 | Low    | 30.13 | 0 | calcite_2ct5    | 4 | 12  |
| Calcite    | Ga0397528_00222 | Full    | 27.235 | Low    | 27.88 | 0 | calcite_2ct6    | 1 | 24  |
| Calcite    | Ga0397528_00468 | Full    | 19.239 | Low    | 25.44 | 0 | calcite_2ct7    | 1 | 8   |
| Calcite    | Ga0397528_00664 | Full    | 16.332 | Low    | 24.6  | 0 | calcite_2ct8    | 2 | 12  |
| Calcite    | Ga0397528_00962 | Full    | 14.287 | Low    | 17.89 | 0 | calcite_2ct9    | 4 | 12  |
| Calcite    | Ga0397528_01098 | Full    | 13.198 | Low    | 19.22 | 0 | calcite_2ct10   | 1 | 9   |
| Calcite    | Ga0397528_03303 | Full    | 7.874  | Low    | 7.22  | 0 | calcite_2ct11   | 1 | 13  |
| Calcite    | Ga0397528_03553 | Full    | 7.643  | Low    | 13.16 | 0 | calcite_2ct12   | 3 | 11  |
| Calcite    | Ga0397528_04289 | Full    | 6.948  | Low    | 16.23 | 0 | calcite_2ct13   | 0 | 9   |
| Calcite    | Ga0397528_05171 | Full    | 6.324  | Low    | 9.35  | 0 | calcite_2ct14   | 4 | 9   |
| Calcite    | Ga0397528_05222 | Full    | 6.118  | Low    | 14.93 | 0 | calcite_2ct15   | 1 | 10  |
| Calcite    | Ga0397528_08206 | Full    | 4.757  | Low    | 8.39  | 0 | calcite_2ct16   | 2 | 33  |
| Calcite    | Ga0397528_08263 | Full    | 4.414  | Low    | 5.52  | 0 | calcite_2ct17   | 1 | 9   |
| Calcite    | Ga0397528_08502 | Full    | 4.29   | Low    | 5.9   | 0 | calcite_2ct18   | 0 | 11  |
| Calcite    | Ga0397528_10284 | Full    | 4.308  | Low    | 6.48  | 0 | calcite_2ct19   | 4 | 485 |
| Calcite    | Ga0397528_10994 | Full    | 4.011  | Low    | 5.29  | 0 | calcite_2ct20   | 0 | 24  |
| Calcite    | Ga0397528_11374 | Full    | 4.049  | Low    | 26.43 | 0 | calcite_2ct21   | 2 | 12  |
| Calcite    | Ga0397528_11519 | Full    | 4.015  | Low    | 8.09  | 0 | calcite_2ct22   | 1 | 33  |
| Calcite    | Ga0397528_11774 | Full    | 3.899  | Low    | 25.44 | 0 | calcite_2ct23   | 1 | 15  |
| Calcite    | Ga0397528_12887 | Full    | 2.745  | Low    | 7.77  | 0 | calcite_2ct24   | 1 | 13  |
| Calcite    | Ga0397528_13622 | Full    | 3.609  | Low    | 6.48  | 0 | calcite_2ct25   | 1 | 12  |
| Calcite    | Ga0397528_13811 | Full    | 3.58   | Low    | 8.55  | 0 | calcite_2ct26   | 2 | 20  |
| Calcite    | Ga0397528_14864 | Full    | 3.415  | Low    | 6.87  | 0 | calcite_2ct27   | 3 | 26  |
| Calcite    | Ga0397528_20264 | Full    | 2.749  | Low    | 6.74  | 0 | calcite_2ct28   | 1 | 28  |
| Calcite    | Ga0397528_20302 | Full    | 2.786  | Low    | 9.39  | 0 | calcite_2ct29   | 1 | 14  |
| Calcite    | Ga0397528_22128 | Full    | 2.59   | Low    | 5.36  | 0 | calcite_2ct30   | 3 | 5   |
| Calcite    | Ga0397528_06764 | Partial | 1.799  | Low    | 29.71 | 0 | calcite_2ct31   | 1 | 5   |
| Calcite    | Ga0397528_00540 | Partial | 12.712 | Low    | 8.79  | 0 | calcite_2ct32   | 1 | 7   |
| Calcite    | Ga0397528_00674 | Partial | 11.027 | Low    | 12.68 | 0 | calcite_2ct33   | 2 | 17  |
| Calcite    | Ga0397528_01028 | Partial | 11.47  | Low    | 5.97  | 0 | calcite_2ct34   | 2 | 17  |
| Calcite    | Ga0397528_51335 | Lt2gene | 1.432  | Low    | 9.37  | 0 | calcite_2ct35   | 1 | 23  |
| Iglimbrite | Ga0397530_00081 | Full    | 42.345 | Medium | 68.53 | 0 | ignimbrite_2ct1 | 6 | 30  |
| Iglimbrite | Ga0397530_00089 | Full    | 40.679 | Medium | 64.04 | 0 | ignimbrite_2ct2 | 7 | 38  |
| Iglimbrite | Ga0397530_00124 | Full    | 36.584 | Medium | 70.77 | 0 | ignimbrite_2ct3 | 9 | 9   |
| Iglimbrite | Ga0397530_00351 | Full    | 24.218 | Low    | 36.16 | 0 | ignimbrite_2ct5 | 5 | 36  |
| Iglimbrite | Ga0397530_00420 | Full    | 24.318 | Low    | 29.95 | 0 | ignimbrite_2ct6 | 5 | 20  |
| Iglimbrite | Ga0397530_00495 | Full    | 22.567 | Medium | 54.12 | 0 | ignimbrite_2ct7 | 4 | 15  |
| Iglimbrite | Ga0397530_00759 | Full    | 18.232 | Low    | 27.48 | 0 | ignimbrite_2ct8 | 2 | 38  |
| Iglimbrite | Ga0397530_00918 | Full    | 16.927 | Low    | 8.46  | 0 | ignimbrite_2ct9 | 0 | 91  |

|            |                 |      |        |     |       |   |                  |   |     |
|------------|-----------------|------|--------|-----|-------|---|------------------|---|-----|
| Ignimbrite | Ga0397530_00940 | Full | 16.584 | Low | 44.23 | 0 | ignimbrite_2ct10 | 6 | 90  |
| Ignimbrite | Ga0397530_01030 | Full | 15.516 | Low | 23.16 | 0 | ignimbrite_2ct11 | 4 | 28  |
| Ignimbrite | Ga0397530_01189 | Full | 14.184 | Low | 8.04  | 0 | ignimbrite_2ct12 | 1 | 257 |
| Ignimbrite | Ga0397530_01215 | Full | 14.798 | Low | 19.1  | 0 | ignimbrite_2ct13 | 6 | 13  |
| Ignimbrite | Ga0397530_01682 | Full | 12.382 | Low | 16.34 | 0 | ignimbrite_2ct14 | 0 | 14  |
| Ignimbrite | Ga0397530_01739 | Full | 12.084 | Low | 23.82 | 0 | ignimbrite_2ct15 | 0 | 13  |
| Ignimbrite | Ga0397530_02667 | Full | 9.447  | Low | 20.11 | 0 | ignimbrite_2ct16 | 2 | 10  |
| Ignimbrite | Ga0397530_02884 | Full | 9.073  | Low | 12.89 | 0 | ignimbrite_2ct17 | 1 | 38  |
| Ignimbrite | Ga0397530_02943 | Full | 8.904  | Low | 10.28 | 0 | ignimbrite_2ct18 | 0 | 12  |
| Ignimbrite | Ga0397530_03159 | Full | 8.588  | Low | 10.34 | 0 | ignimbrite_2ct20 | 1 | 8   |
| Ignimbrite | Ga0397530_03251 | Full | 8.432  | Low | 35.53 | 0 | ignimbrite_2ct21 | 2 | 8   |
| Ignimbrite | Ga0397530_03802 | Full | 7.35   | Low | 6.54  | 0 | ignimbrite_2ct22 | 1 | 19  |
| Ignimbrite | Ga0397530_04089 | Full | 7.389  | Low | 6.57  | 0 | ignimbrite_2ct23 | 1 | 11  |
| Ignimbrite | Ga0397530_04141 | Full | 7.332  | Low | 9.55  | 0 | ignimbrite_2ct24 | 1 | 7   |
| Ignimbrite | Ga0397530_04153 | Full | 7.319  | Low | 10.02 | 0 | ignimbrite_2ct25 | 1 | 21  |
| Ignimbrite | Ga0397530_04315 | Full | 7.128  | Low | 12.57 | 0 | ignimbrite_2ct26 | 1 | 6   |
| Ignimbrite | Ga0397530_05470 | Full | 5.847  | Low | 7.71  | 0 | ignimbrite_2ct28 | 2 | 9   |
| Ignimbrite | Ga0397530_05700 | Full | 5.974  | Low | 9.08  | 0 | ignimbrite_2ct29 | 3 | 8   |
| Ignimbrite | Ga0397530_06523 | Full | 5.422  | Low | 12.83 | 0 | ignimbrite_2ct30 | 1 | 13  |
| Ignimbrite | Ga0397530_06571 | Full | 5.395  | Low | 5.96  | 0 | ignimbrite_2ct31 | 3 | 11  |
| Ignimbrite | Ga0397530_06661 | Full | 5.306  | Low | 8.23  | 0 | ignimbrite_2ct32 | 1 | 27  |
| Ignimbrite | Ga0397530_06738 | Full | 5.231  | Low | 12.45 | 0 | ignimbrite_2ct33 | 4 | 8   |
| Ignimbrite | Ga0397530_07734 | Full | 4.789  | Low | 7.67  | 0 | ignimbrite_2ct34 | 2 | 12  |
| Ignimbrite | Ga0397530_07990 | Full | 4.694  | Low | 7.73  | 0 | ignimbrite_2ct35 | 3 | 8   |
| Ignimbrite | Ga0397530_08209 | Full | 4.618  | Low | 8.82  | 0 | ignimbrite_2ct36 | 2 | 28  |
| Ignimbrite | Ga0397530_08487 | Full | 4.3    | Low | 9.87  | 0 | ignimbrite_2ct37 | 1 | 12  |
| Ignimbrite | Ga0397530_09499 | Full | 4.146  | Low | 6.2   | 0 | ignimbrite_2ct38 | 1 | 8   |
| Ignimbrite | Ga0397530_09804 | Full | 4.049  | Low | 8.62  | 0 | ignimbrite_2ct39 | 1 | 11  |
| Ignimbrite | Ga0397530_10083 | Full | 3.969  | Low | 5.94  | 0 | ignimbrite_2ct40 | 1 | 6   |
| Ignimbrite | Ga0397530_10466 | Full | 3.712  | Low | 8.57  | 0 | ignimbrite_2ct41 | 1 | 7   |
| Ignimbrite | Ga0397530_10580 | Full | 3.238  | Low | 6.74  | 0 | ignimbrite_2ct42 | 1 | 21  |
| Ignimbrite | Ga0397530_12410 | Full | 3.374  | Low | 6.05  | 0 | ignimbrite_2ct43 | 2 | 6   |
| Ignimbrite | Ga0397530_14057 | Full | 3.081  | Low | 8.71  | 0 | ignimbrite_2ct44 | 1 | 33  |
| Ignimbrite | Ga0397530_14239 | Full | 2.775  | Low | 6.24  | 0 | ignimbrite_2ct45 | 1 | 7   |
| Ignimbrite | Ga0397530_14393 | Full | 3.022  | Low | 7.26  | 0 | ignimbrite_2ct46 | 1 | 5   |
| Ignimbrite | Ga0397530_14629 | Full | 2.978  | Low | 6.34  | 0 | ignimbrite_2ct47 | 1 | 8   |
| Ignimbrite | Ga0397530_15383 | Full | 2.859  | Low | 10.01 | 0 | ignimbrite_2ct48 | 1 | 9   |
| Ignimbrite | Ga0397530_15895 | Full | 2.785  | Low | 6.9   | 0 | ignimbrite_2ct49 | 1 | 7   |
| Ignimbrite | Ga0397530_15988 | Full | 2.771  | Low | 5.15  | 0 | ignimbrite_2ct50 | 2 | 5   |



|            |                 |         |        |     |       |   |                  |   |      |
|------------|-----------------|---------|--------|-----|-------|---|------------------|---|------|
| Ignimbrite | Ga0397530_16319 | Full    | 2.72   | Low | 5.6   | 0 | ignimbrite_2ct51 | 1 | 5    |
| Ignimbrite | Ga0397530_17695 | Full    | 2.548  | Low | 6.08  | 0 | ignimbrite_2ct52 | 0 | 25   |
| Ignimbrite | Ga0397530_18692 | Full    | 2.432  | Low | 8.29  | 0 | ignimbrite_2ct53 | 1 | 27   |
| Ignimbrite | Ga0397530_00096 | Partial | 11.677 | Low | 19.65 | 0 | ignimbrite_2ct54 | 1 | 27   |
| Ignimbrite | Ga0397530_00308 | Partial | 12.629 | Low | 25.76 | 0 | ignimbrite_2ct55 | 1 | 11   |
| Ignimbrite | Ga0397530_21188 | lt2gene | 2.188  | Low | 5.01  | 0 | ignimbrite_2ct56 | 1 | 4    |
|            | Total           |         |        |     |       |   |                  |   | 2911 |

**Table S3.** Metabolic categories for viral auxiliary metabolic genes (AMGs) identified by DRAMv

| Substrate  | Number of AMGs | Identifiable AMG Categories                                                                                                                                       |
|------------|----------------|-------------------------------------------------------------------------------------------------------------------------------------------------------------------|
| Calcite    | 7              | <ul style="list-style-type: none"> <li>Pyrimidine deoxyribonucleotide biosynthesis</li> </ul>                                                                     |
| Gypsum     | 5              | <ul style="list-style-type: none"> <li>Glucuronate pathway</li> <li>Nucleotide sugar biosynthesis</li> <li>Pyrimidine deoxyribonucleotide biosynthesis</li> </ul> |
| Ignimbrite | 1              | Organic Nitrogen <ul style="list-style-type: none"> <li>Methionine degradation</li> </ul>                                                                         |

### **File S1. Analysis pipelines and visualization scripts used in this study**

#Endolithic viruses scripts and links to github or bitbucket pages for programs

#VirSorter2

#link: <https://github.com/jiarong/VirSorter2>

```
virsorter run -w viruses.out -i ignimbrite_coassembled_contigs.fna --include-groups "dsDNaphage,NCLDV,ssDNA, lavidaviridae" -j 4 --min-score 0.75 --hallmark-required --hallmark-required-on-short --min-length 3
```

#repeat for each rock type

#CheckV

#link: <https://bitbucket.org/berkeleylab/checkv/src/master/>

#to keep the sequences that are >5% complete, used the following commands

```
checkv end_to_end calcite_aa.fasta output_directory -t 16 -d checkv-db-v0.6
bioawk -c fastx '{print ">"$name ; print $seq}' my_contigs.fasta >
```

```
my_contigs.format.fasta
```

```
tail -n+2 quality_summary.tsv | awk '{ if ($10>5 && $10!="NA") {print $1}}' >
```

```
my_study_contig_names_over5checkv.txt
```

```
grep -A1 -Ff my_study_contig_names_over5checkv.txt
```

```
my_contigs.format.fasta | sed '/- /d' > my_contigs_over5checkv.fasta
```

#repeat for each rock type

#vConTACT2

#link: <https://bitbucket.org/MAVERICLab/vcontact2/src/master/>

```
#to prepare the gene-to-genome files which require protein files, used
prodigal
prodigal -i contigs.fasta -a contigs.aa.fasta -p meta
#default settings in vConTACT2 were used
#networks were produced in Cytoscape with the output of vConTACT2
#repeat for each rock type

#CenoteTaker2
#link: https://github.com/mtisza1/Cenote-Taker2
#repeat for each rock type

#Clinker
#link: https://github.com/gamcil/clinker
#default settings were used
#repeat for each rock type

#PHACTS
#link: https://github.com/deprekate/PHACTS
#default settings were used
#repeat for each rock type

#host prediction
#link: ARAGORN:
https://github.com/TheSEED/aragorn/blob/master/aragorn1.2.36.c
#link: CRISPR CasTyper: https://github.com/Russel88/CRISPRCasTyper
#default settings were used for ARAGORN and CRISPRCasTyper
#repeat for each rock type

#VIBRANT
#link: https://github.com/AnantharamanLab/VIBRANT
#default settings were used
#repeat for each rock type

#DRAMv
#link: https://github.com/WrightonLabCSU/DRAM/wiki/3b.-Running-DRAM-v
#default settings were used
#repeat for each rock type

#CMSeq2
#link: https://github.com/SegataLab/cmseq/blob/master/README.md
#to QC the reads, used fastp pipeline
fastp -i READS_1.fastq -I READS_2.fastq -o READS_1.trim.fastq -O
READS_2.trim.fastq -w 8
#to align reads to the fasta contigs, used bowtie2 to generate .sam files.
bowtie2 -q -p8 -x bowtie_dbs/my_virus_contigs -1 reads_1.trim.fastq -2
reads_2.trim.fastq -S reads_align_to_my_virus_contigs.sam
#to convert to .bam, sort the .bam, index the .bam, used samtools
samtools view -bS -threads 8 READS_align_to_my_virus_contigs.sam >
reads_align_to_my_virus_contigs.bam
samtools sort -threads 8 reads_align_to_my_virus_contigs.bam -o
reads_align_to_my_virus_contigs.sorted.bam
samtools index reads_align_to_my_virus_contigs.sorted.bam
#cmseq2 input
breadth_depth.py reads_align_to_my_virus_contigs.sorted.bam >
reads_align_to_my_virus_contigs.sorted.cmseq1.tsv
#repeat for each rock type
```
